# Supplementary material
Source: publisher figshare collection journal article supplement (https://karger.figshare.com/ndownloader/files/25353524)
Supplement: Supplementary file 1 [file 25353524]

**Supplementary Table S2. Haplotypes of *ADIPOQ* in MH and MUH phenotypes**

|  | **Normal weight MH**  **N=92** | **Normal weight MUH**  **N=40** | ***χ*2** | **p-value*** | **Excess weight MH**  **N=74** | **Excess weight MUH**  **N=139** | ***χ*2** | **p-value*** |
| --- | --- | --- | --- | --- | --- | --- | --- | --- |
| **Loci of haplotype analysis: -11391G>A and -11377C>G** | | | | | | | | |
| **11=GC** | 0.625 | 0.614 | 0.025 | 0.875 | 0.628 | 0.612 | 0.117 | 0.733 |
| **12=GG** | 0.326 | 0.311 | 0.054 | 0.816 | 0.318 | 0.320 | 0.003 | 0.957 |
| **21=AC** | 0.049 | 0.074 | 0.642 | 0.423 | 0.054 | 0.068 | 0.333 | 0.563 |
| **Loci of haplotype analysis: +45T>G and +276G>T** | | | | | | | | |
| **11=TG** | 0.587 | 0.675 | 1.809 | 0.179 | 0.547 | 0.583 | 0.495 | 0.482 |
| **12=TT** | 0.228 | 0.212 | 0.078 | 0.799 | 0.311 | 0.263 | 1.116 | 0.291 |
| **21=GG** | 0.185 | 0.112 | 2.127 | 0.145 | 0.142 | 0.155 | 0.124 | 0.725 |
| MH: Metabolically healthy; MUH: Metabolically unhealthy  * Probability with the *X*2 test by genotypes and alleles for a 2x2 table | | | | | | | | |
